# Supplementary material for: Photoprocesses of the tyrosine kinase inhibitor gefitinib: from femtoseconds to microseconds and from solution to cells
Source: Royal Society of Chemistry journal article supplement (doi:10.1039/d1sc03154f), 2021-01-01
Supplement: d1sc03154f1.pdf [file d1sc03154f1.pdf]

## Electronic Supplementary Information

### Photoprocesses of the tyrosine kinase inhibitor gefitinib: from femtoseconds to microseconds and from solution to the cell

Lorena Tamarit, Meryem El Ouardi, Inmaculada Andreu, Ignacio Vayá, Miguel A. Miranda

**Fig. S1** Cell viability dose-response curves of HaCaT cells treated with A) GFT, B) SDS and C) CPZ in the presence ( $\square$ ) or absence ( $\blacksquare$ ) of UVA Light ( $5 \text{ J/cm}^2$ ). Both CPZ and SDS were used as positive and negative phototoxicity controls, respectively. Data represent the mean  $\pm$  SD from four independent experiments performed in triplicate.

**Fig. S2** UV absorption spectra of GFT ( $10 \text{ }\mu\text{M}$ ) in acetonitrile (black), 1,4-dioxane (red), toluene (blue) and cyclohexane (green).

**Fig. S3** Fluorescence spectra for GFT in deaerated (dashed line) and aerated (solid line) acetonitrile after excitation at 340 nm.

**Fig. S4** Normalized excitation (dashed line) and emission (solid line) spectra for GFT in cyclohexane. The excitation spectrum was measured at  $\lambda_{\text{max}} = 378 \text{ nm}$ , while the emission spectrum was recorded at  $\lambda_{\text{exc}} = 340 \text{ nm}$ .

**Fig. S5** Fluorescence spectra of GFT in a solid matrix of ethanol (gray) and cyclohexane (green) at 77K after excitation at 340 nm.

**Fig. S6** Femtosecond transient absorption kinetic traces for GFT at 470 nm (black) and 605 nm (blue) after excitation at 330 nm in toluene.

**Fig. S7** Phosphorescence spectra for GFT in a solid matrix of ethanol at 77 K after excitation at 340 nm.

**Fig. S8** A) LFP spectra for GFT (black) and for a mixture containing GFT and NPX (blue), B) decay traces at 600 nm for GFT (solid line) and for a mixture containing GFT and NPX (dashed line) and C) decay traces at 430 nm for GFT (black) and for a mixture containing GFT and NPX (blue). All measurements were performed in deaerated MeCN after excitation at 355 nm at concentrations of  $50 \text{ }\mu\text{M}$  for GFT and  $0.01 \text{ M}$  for NPX.

**Fig. S9** LFP decays at 610 nm for GFT in MeCN (black) or ethanol (blue) after excitation at 355 nm in deaerated conditions.

**Fig. S10** UV absorption spectra for GFT (dashed line), HSA (dotted line) and GFT@HSA at 1:1 molar ratio (solid line) in aerated PBS at 10  $\mu$ M.

**Fig. S11** A) Fluorescence decay traces of GFT (20  $\mu$ M) in the presence of increasing amounts of 3-methylindole (1:15, 1:30, 1:75 and 1:120) in cyclohexane at  $\lambda_{\text{exc}} = 340$  nm. B) Stern-Volmer plot.

**Fig. S12** LFP spectra A) and decay traces at 600 nm B) of isoabsorptive solutions at the excitation wavelength for GFT in deaerated MeCN (black circles) and GFT@HSA 1:1 in aerated PBS (white circles) at  $\lambda_{\text{exc}} = 355$  nm.

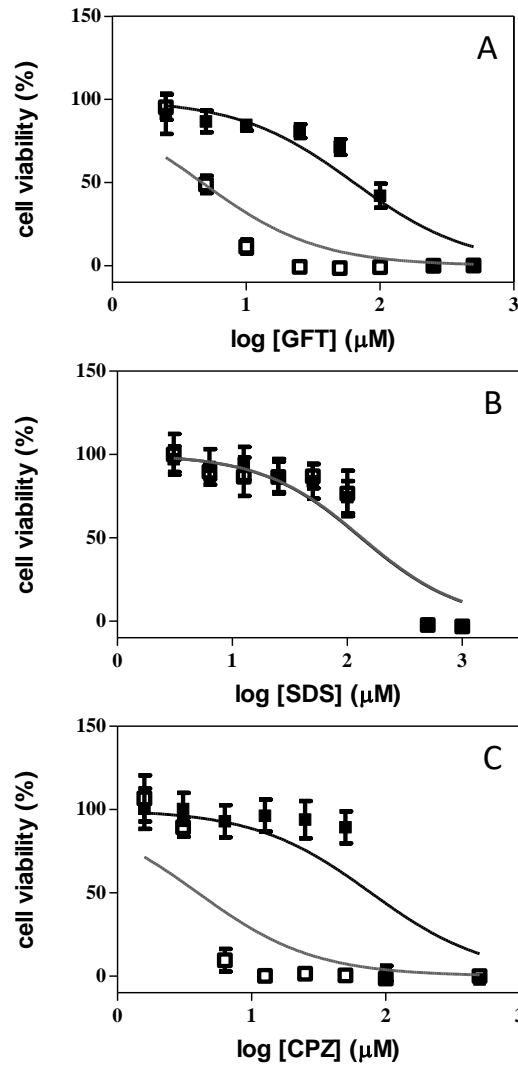

**Fig. S1** Cell viability dose-response curves of HaCaT cells treated with A) GFT, B) SDS and C) CPZ in the presence ( $\square$ ) or absence ( $\blacksquare$ ) of UVA Light ( $5 \text{ J/cm}^2$ ). Both CPZ and SDS were used as positive and negative phototoxicity controls, respectively. Data represent the mean  $\pm$  SD from four independent experiments performed in triplicate.

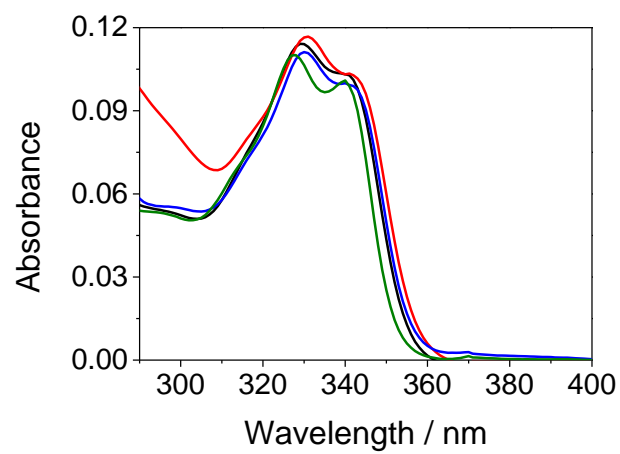

**Fig. S2** UV absorption spectra of GFT (10  $\mu$ M) in acetonitrile (black), 1,4-dioxane (red), toluene (blue) and cyclohexane (green).

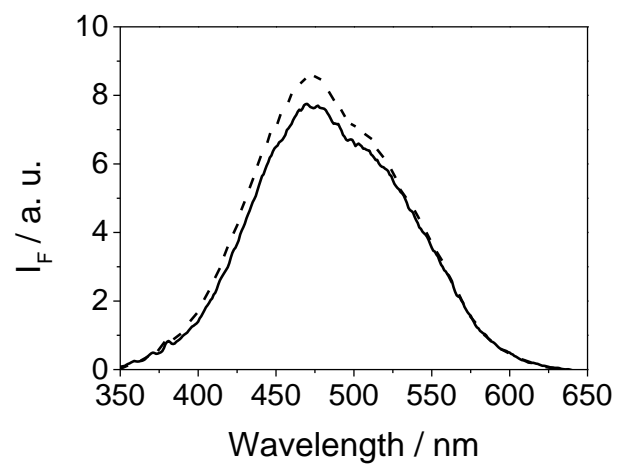

**Fig. S3** Fluorescence spectra for GFT in deaerated (dashed line) and aerated (solid line) acetonitrile after excitation at 340 nm.

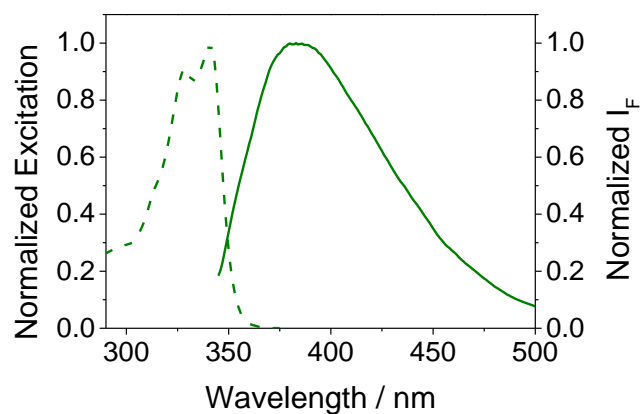

**Fig. S4** Normalized excitation (dashed line) and emission (solid line) spectra for GFT in cyclohexane. The excitation spectrum was measured at  $\lambda_{\text{max}} = 378$  nm, while the emission spectrum was recorded at  $\lambda_{\text{exc}} = 340$  nm.

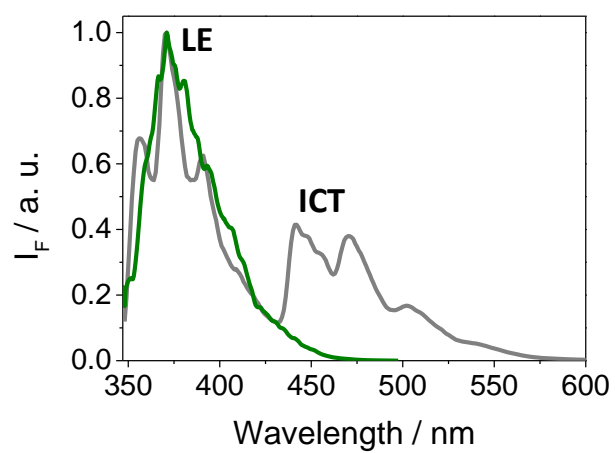

**Fig. S5** Fluorescence spectra of GFT in a solid matrix of ethanol (gray) and cyclohexane (green) at 77K after excitation at 340 nm.

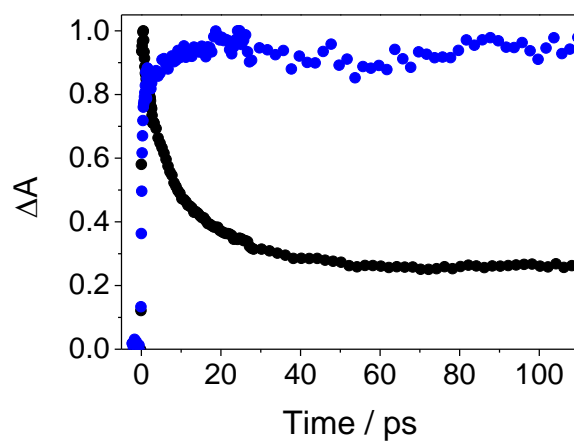

**Fig. S6** Femtosecond transient absorption kinetic traces for GFT at 470 nm (black) and 605 nm (blue) after excitation at 330 nm in toluene.



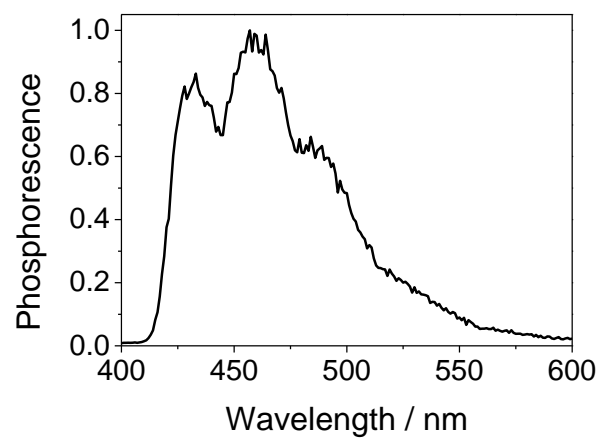

**Fig. S7** Phosphorescence spectra for GFT in a solid matrix of ethanol at 77 K after excitation at 340 nm.

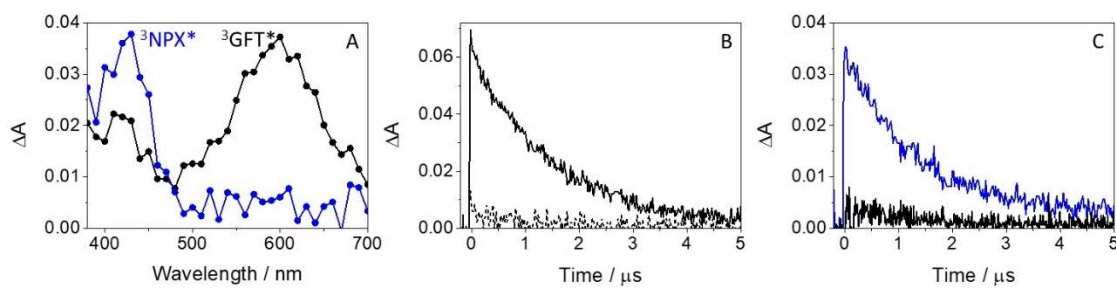

**Fig. S8** A) LFP spectra for GFT (black) and for a mixture containing GFT and NPX (blue), B) decay traces at 600 nm for GFT (solid line) and for a mixture containing GFT and NPX (dashed line) and C) decay traces at 430 nm for GFT (black) and for a mixture containing GFT and NPX (blue). All measurements were performed in deaerated MeCN after excitation at 355 nm at concentrations of 50  $\mu\text{M}$  for GFT and 0.01 M for NPX.

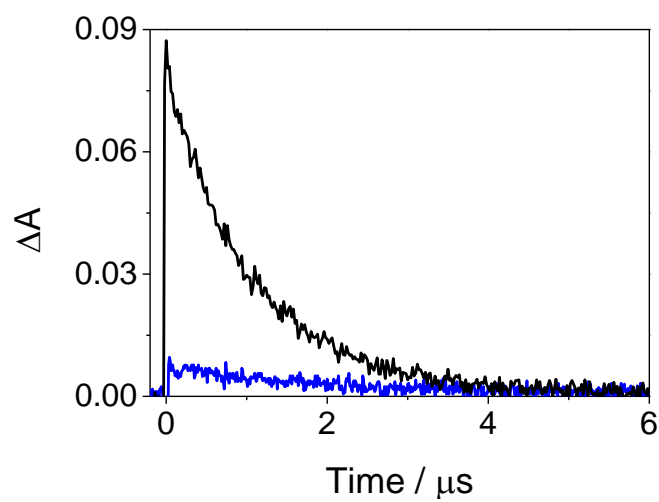

**Fig. S9** LFP decays at 610 nm for GFT in MeCN (black) or ethanol (blue) after excitation at 355 nm in deaerated conditions.

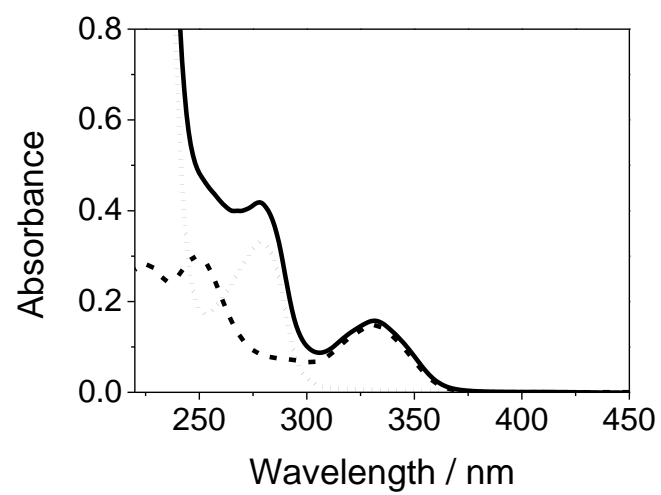

**Fig. S10** UV absorption spectra for GFT (dashed line), HSA (dotted line) and GFT@HSA at 1:1 molar ratio (solid line) in aerated PBS at 10  $\mu$ M.

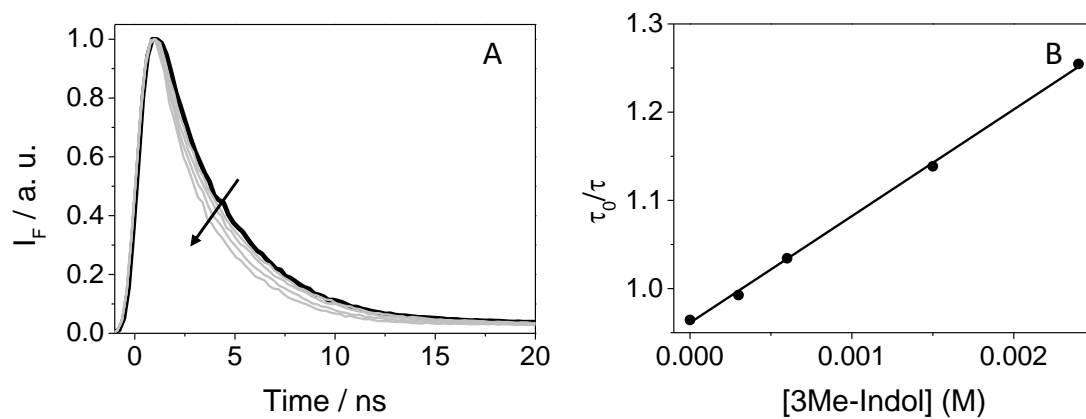

**Fig. S11** A) Fluorescence decay traces of GFT (20  $\mu\text{M}$ ) in the presence of increasing amounts of 3-methylindole (1:15, 1:30, 1:75 and 1:120) in cyclohexane at  $\lambda_{\text{exc}} = 340 \text{ nm}$ . B) Stern-Volmer plot.

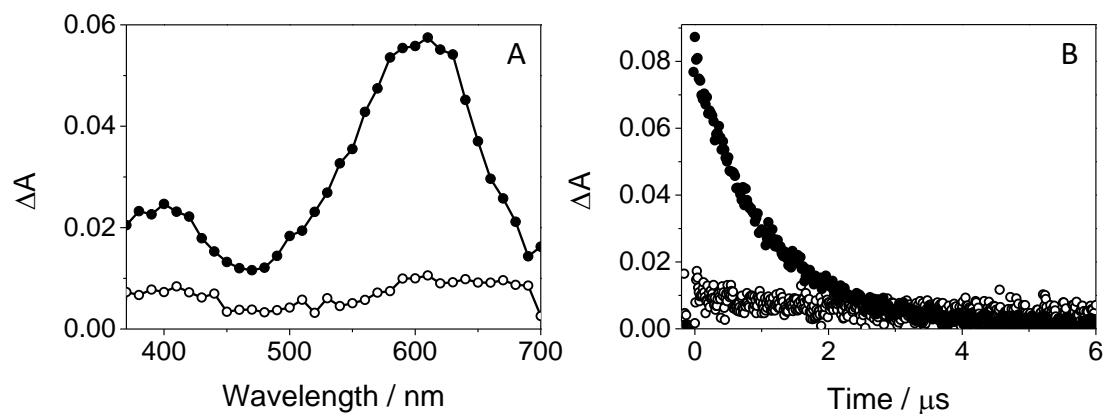

**Fig. S12** LFP spectra A) and decay traces at 600 nm B) of isoabsorptive solutions at the excitation wavelength for GFT in deaerated MeCN (black circles) and GFT@HSA 1:1 in aerated PBS (white circles) at  $\lambda_{exc} = 355$  nm.
